# Supplementary material for: Infective Endocarditis in Belgium: Prospective Data in Adults from the ESC EORP European Endocarditis Registry
Source: MDPI journal article supplement (doi:10.3390/jcm13051371), 2024-02-28
Supplement: s1 [file s1]

## Supplementary material

**Supplementary Table S1.** Definitions of the terms used in the European Society of Cardiology 2015 modified criteria for the diagnosis of infective endocarditis.

### Major criteria

1. Blood cultures positive for IE
  - a. Typical microorganisms consistent with IE from 2 separate blood cultures:
    - Viridans streptococci, *Streptococcus gallolyticus* (*S bovis*), HACEK group, *S. aureus*, or
    - Community-acquired enterococci, in the absence of a primary focus; or
  - b. Microorganisms consistent with IE from persistently positive blood cultures:
    - $\geq 2$  positive blood cultures of blood samples drawn  $> 12$  h apart; or
    - All of 3 or a majority of  $\geq 4$  separate cultures of blood (with first and last samples drawn  $\geq 1$  h apart); or
  - c. Single positive blood culture for *Coxiella burnetii* or phase I IgG antibody titre  $> 1:800$
2. Imaging positive for IE
  - a. Echocardiogram positive for IE:
    - Vegetation;
    - Abscess, pseudoaneurysm, intracardiac fistula;
    - Valvular perforation or aneurysm
    - New partial dehiscence of prosthetic valve
  - b. Abnormal activity around the site of prosthetic valve implantation detected by  $^{18}\text{F}$ -FDG PET/CT (only if the prosthesis was implanted for  $> 3$  months) or radiolabelled leukocytes SPECT/CT
  - c. Definite paravalvular lesions by cardiac CT

### Minor criteria

1. Predisposition such as predisposing heart condition, or injection drug use
2. Fever defined as temperature  $> 38^{\circ}\text{C}$
3. Vascular phenomena (including those detected only by imaging): major arterial emboli, septic pulmonary infarcts, infectious (mycotic) aneurysm, intracranial haemorrhage, conjunctival haemorrhages, and Janeway's lesions
4. Immunological phenomena: glomerulonephritis, Osler's nodes, Roth's spots, and rheumatoid factor

5. Microbiological evidence: positive blood culture but does not meet a major criterion as noted above or serological evidence of active infection with organism consistent with IE

**Supplementary Table S2.** Clinical presentation of Belgian infective endocarditis patients.

|                                   | Total<br>(n = 127) | NVE<br>(n = 75) | PRVE<br>(n = 45) | CDRIE<br>(n = 7) | P-value |
|-----------------------------------|--------------------|-----------------|------------------|------------------|---------|
| <b>Signs and symptoms</b>         |                    |                 |                  |                  |         |
| Fever                             | 89/127 (70.1%)     | 49/75 (65.3%)   | 35/45 (77.8%)    | 5/7 (71.4%)      | 0.390   |
| Cardiac murmur                    | 63/127 (49.6%)     | 43/75 (57.3%)   | 19/45 (42.2%)    | 1/7 (14.3%)      | 0.047*  |
| Dizziness                         | 26/127 (20.5%)     | 19/75 (25.3%)   | 5/45 (11.1%)     | 2/7 (28.6%)      | 0.113   |
| Congestive heart failure          | 23/127 (18.1%)     | 12/75 (16.0%)   | 8/45 (17.8%)     | 3/7 (42.9%)      | 0.201   |
| Shortness of breath               | 23/127 (18.1%)     | 12/75 (16.0%)   | 9/45 (20.0%)     | 2/7 (28.6%)      | 0.515   |
| Cough                             | 12/127 (9.4%)      | 6/75 (8.0%)     | 4/45 (8.9%)      | 2/7 (28.6%)      | 0.201   |
| Septic shock                      | 12/127 (9.4%)      | 7/75 (9.3%)     | 4/45 (8.9%)      | 1/7 (14.3%)      | 0.775   |
| Chest pain                        | 7/127 (5.5%)       | 6/75 (8.0%)     | 1/45 (2.2%)      | 0/7 (0.0%)       | 0.500   |
| Syncope                           | 5/127 (3.9%)       | 3/75 (4.0%)     | 2/45 (4.4%)      | 0/7 (0.0%)       | 1.000   |
| Janeway lesions                   | 5/127 (3.9%)       | 2/75 (2.7%)     | 3/45 (6.7%)      | 0/7 (0.0%)       | 0.519   |
| Osler's nodes                     | 4/127 (3.1%)       | 3/75 (4.0%)     | 1/45 (2.2%)      | 0/7 (0.0%)       | 1.000   |
| Cerebrovascular accident          | 3/127 (2.4%)       | 2/75 (2.7%)     | 1/45 (2.2%)      | 0/7 (0.0%)       | 1.000   |
| Cardiogenic shock                 | 2/127 (1.6%)       | 1/75 (1.3%)     | 1/45 (2.2%)      | 0/7 (0.0%)       | 1.000   |
| Roth spots                        | 2/127 (1.6%)       | 2/75 (2.7%)     | 0/45 (0.0%)      | 0/7 (0.0%)       | 0.580   |
| <b>Complications at admission</b> |                    |                 |                  |                  |         |
| Embololic events                  | 33/127 (26%)       | 25/75 (33.3%)   | 8/45 (17.8%)     | 0/7 (0.0%)       | 0.046*  |
| Pulmonary                         | 3/127 (2.4%)       | 3/75 (4.0%)     | 0/45 (0.0%)      | 0/7 (0.0%)       | 0.404   |
| Cerebral                          | 19/127 (15.0%)     | 15/75 (20.0%)   | 4/45 (8.9%)      | 0/7 (0.0%)       | 0.169   |
| Splenic                           | 3/127 (2.4%)       | 2/75 (2.7%)     | 1/45 (2.2%)      | 0/7 (0.0%)       | 1.000   |
| Coronary                          | 1/127 (0.8%)       | 1/75 (1.3%)     | 0/45 (0.0%)      | 0/7 (0.0%)       | 1.000   |
| Renal                             | 4/127 (3.1%)       | 4/75 (5.3%)     | 0/45 (0.0%)      | 0/7 (0.0%)       | 0.437   |
| Hepatic                           | 0/127 (0.0%)       | 0/75 (0.0%)     | 0/45 (0.0%)      | 0/7 (0.0%)       | 1.000   |
| Peripheral                        | 3/127 (2.4%)       | 2/75 (2.7%)     | 1/45 (2.2%)      | 0/7 (0.0%)       | 1.000   |

|                     | Total<br>(n = 127) | NVE<br>(n = 75) | PRVE<br>(n = 45) | CDRIE<br>(n = 7) | <i>P</i> -value |
|---------------------|--------------------|-----------------|------------------|------------------|-----------------|
| Abscess             | 17/127 (13.4%)     | 13/75 (17.3%)   | 3/45 (6.7%)      | 1/6 (14.3%)      | 0.201           |
| Spondylitis         | 11/127 (8.7%)      | 7/75 (9.3%)     | 4/45 (8.9%)      | 0/7 (0.0%)       | 1.000           |
| Haemorrhagic Stroke | 0/127 (0.0%)       | 0/75 (0.0%)     | 0/45 (0.0%)      | 0/7 (0.0%)       | 1.000           |

CDRIE, cardiac device related infective endocarditis; NVE, native valve infective endocarditis; PRVE, prosthetic or repaired valve infective endocarditis. A value of  $P < 0.050$  was considered significant. (\*) denotes significant  $P$ -values.

**Supplementary Table S3.** Microbiology in Belgian infective endocarditis patients.

|                                     | Total<br>(n = 110) | NVE<br>(n = 64) | PRVE<br>(n = 39) | CDRIE<br>(n = 7) | <i>P</i> -value |
|-------------------------------------|--------------------|-----------------|------------------|------------------|-----------------|
| Methi-S <i>S. aureus</i>            | 37/110 (33.6%)     | 21/64 (32.8%)   | 12/39 (32.4%)    | 4/7 (57.1%)      | 0.440           |
| Methi-R <i>S. aureus</i>            | 4/110 (3.6%)       | 3/64 (4.7%)     | 0/39 (0%)        | 1/7 (14.3%)      | 0.091           |
| Methi-S <i>Staph. coagulase</i>     | 7/110 (6.4%)       | 3/64 (4.7%)     | 4/39 (10.3%)     | 0/7 (0.0%)       | 0.638           |
| negative                            |                    |                 |                  |                  |                 |
| Methi-R <i>Staph. coagulase</i>     | 6/110 (5.5%)       | 1/64 (1.6%)     | 5/39 (12.8%)     | 0/7 (0.0%)       | 0.083           |
| negative                            |                    |                 |                  |                  |                 |
| <i>S. viridans</i>                  | 17/110 (15.5%)     | 13/64 (20.3%)   | 3/39 (7.7%)      | 1/7 (14.3%)      | 0.197           |
| <i>Enterococcus</i>                 | 17/110 (15.5%)     | 6/64 (9.4%)     | 9/39 (23.1%)     | 2/7 (28.6%)      | 0.072           |
| <i>S. gallolyticus</i>              | 9/110 (8.2%)       | 6/64 (9.4%)     | 3/39 (7.7%)      | 0/7 (0.0%)       | 1.000           |
| Gram negative bacillus              | 3/110 (2.7%)       | 1/64 (1.6%)     | 2/39 (5.1%)      | 0/7 (0.0%)       | 0.637           |
| <i>C. burnetii</i> IgG anti phase I | 0/127 (0.0%)       | 0/75 (0.0%)     | 0/45 (0.0%)      | 0/7 (0.0%)       | -               |

Methi-R, methicilline-resistant; Methi-S, methicilline-sensitive. A value of  $P < 0.050$  was considered significant.

**Supplementary Table S4.** In-hospital complications under therapy in Belgian infective endocarditis patients.

|                                    | Total<br>(n = 127) | NVE (n = 75)  | PRVE (n = 45) | CDRIE (n = 7) | P-value |
|------------------------------------|--------------------|---------------|---------------|---------------|---------|
| <b>Complications under therapy</b> |                    |               |               |               |         |
| Acute renal failure                | 46/127 (36.2%)     | 24/75 (32.0%) | 19/45 (42.2%) | 3/7 (42.9%)   | 0.459   |
| Embolic events                     | 30/127 (23.6%)     | 21/75 (28.0%) | 9/45 (20.0%)  | 0/7 (0.0%)    | 0.211   |
| Pulmonary                          | 4/30 (13.3%)       | 2/21 (9.5%)   | 2/9 (22.2%)   | -             | 0.563   |
| Cerebral                           | 14/30 (46.7%)      | 10/21 (47.6%) | 4/9 (44.4%)   | -             | 1.000   |
| TIA                                | 2/25 (8.0%)        | 2/18 (11.1%)  | 0/7 (0.0%)    | -             | 1.000   |
| Stroke                             | 8/25 (32.0%)       | 5/18 (27.8%)  | 3/7 (42.9%)   | -             | 0.640   |
| Spleen                             | 5/30 (16.7%)       | 3/21 (14.3%)  | 2/9 (22.2%)   | -             | 0.622   |
| Coronary                           | 2/30 (6.7%)        | 1/21 (4.8%)   | 1/9 (11.1%)   | -             | 0.517   |
| Renal                              | 6/30 (20.0%)       | 5/21 (23.8%)  | 1/9 (11.1%)   | -             | 0.637   |
| Hepatic                            | 1/30 (3.3%)        | 1/21 (4.8%)   | 0/9 (0.0%)    | -             | 1.000   |
| Peripheral                         | 1/30 (3.3%)        | 1/21 (4.8%)   | 0/9 (0.0%)    | -             | 1.000   |
| Positive blood cultures after 48h  | 26/127 (20.5%)     | 13/75 (17.3%) | 11/45 (24.4%) | 2/7 (28.6%)   | 0.511   |
| Thrombopenia (<100000)             | 20/127 (15.7%)     | 13/75 (17.3%) | 6/45 (13.3%)  | 1/7 (14.3%)   | 0.849   |
| Spondylitis                        | 15/127 (11.8%)     | 9/75 (12.0%)  | 6/45 (13.3%)  | 0/7 (0.0%)    | 0.909   |
| Septic shock                       | 15/127 (11.8%)     | 7/75 (9.3%)   | 6/45 (13.3%)  | 2/7 (28.6%)   | 0.216   |
| Increasing vegetation size         | 12/127 (9.4%)      | 6/75 (8.0%)   | 6/45 (13.3%)  | 0/7 (0.0%)    | 0.437   |
| CHF                                | 11/127 (8.7%)      | 8/75 (10.7%)  | 3/45 (6.7%)   | 0/7 (0.0%)    | 0.754   |
| Glomerulonephritis                 | 11/127 (8.7%)      | 9/75 (12.0%)  | 2/45 (4.4%)   | 0/7 (0.0%)    | 0.338   |
| Persistent fever (>7 days)         | 9/127 (7.1%)       | 4/75 (5.3%)   | 4/45 (8.9%)   | 1/7 (14.3%)   | 0.315   |
| Cardiogenic shock                  | 7/127 (5.5%)       | 4/75 (5.3%)   | 3/45 (6.7%)   | 0/7 (0.0%)    | 1.000   |
| New abscess                        | 7/127 (5.5%)       | 4/75 (5.3%)   | 3/45 (6.7%)   | 0/7 (0.0%)    | 1.000   |
| AV block                           | 5/127 (3.9%)       | 3/75 (4.0%)   | 2/45 (4.4%)   | 0/7 (0.0%)    | 1.000   |
| Mycotic aneurysm                   | 4/127 (3.1%)       | 2/75 (2.7%)   | 2/45 (4.4%)   | 0/7 (0.0%)    | 0.698   |
| Cerebral Haemorrhage               | 1/127 (0.8%)       | 0/75 (0.0%)   | 1/45 (2.2%)   | 0/7 (0.0%)    | 0.413   |

|                     | Total<br>(n = 127) | NVE (n = 75) | PRVE (n = 45) | CDRIE (n = 7) | <i>P</i> -value |
|---------------------|--------------------|--------------|---------------|---------------|-----------------|
| Haemorrhagic Stroke | 0/127 (0.0%)       | 0/75 (0.0%)  | 0/45 (0.0%)   | 0/7 (0.0%)    | 1.000           |

CDRIE, cardiac device related infective endocarditis; CHF, Congestive Heart Failure; NVE, native valve infective endocarditis; PRVE, prosthetic or repaired valve infective endocarditis. A value of  $P < 0.050$  was considered significant.

**Supplementary Table S5.** Univariate Cox regression analysis for all causes of death in hospital in Belgian IE patients.

|                                           | Hazard Ratio | 95% CI        | <i>P</i> -value |
|-------------------------------------------|--------------|---------------|-----------------|
| Type of endocarditis: prosthesis + repair | 2.27         | [0.87-5.96]   | 0.096           |
| Source of infection: community acquired   | 1.18         | [0.14-9.59]   | 0.880           |
| Age < 65 yo                               | 0.62         | [0.24-1.63]   | 0.806           |
| Age 65 - 79 yo                            | 1.32         | [0.53-3.25]   | 0.335           |
| Age ≥ 80 yo                               | 1.85         | [0.40-8.56]   | 0.553           |
| Gender: male                              | 0.98         | [0.37-2.59]   | 0.964           |
| Charlson index                            | 1.18         | [1.04-1.34]   | 0.011*          |
| Creatinine >2mg/dl                        | 3.49         | [1.34-9.08]   | 0.011*          |
| <i>S. aureus</i>                          | 2.38         | [0.88-6.49]   | 0.089           |
| Congestive heart failure                  | 0.84         | [0.28-2.56]   | 0.757           |
| Vegetation size > 10 mm                   | 2.31         | [0.28-19.28]  | 0.439           |
| Cerebral complication                     | 1.71         | [0.28-10.55]  | 0.564           |
| Abscess                                   | 1.13         | [0.32-4.00]   | 0.853           |
| Indication for surgery - not performed    | 13.72        | [1.56-120.61] | 0.018*          |
| Indication for surgery - performed        | 3.34         | [0.43-25.93]  | 0.018*          |

yo: years old. A value of  $P < 0.050$  was considered significant. (\*) denotes significant  $P$ -values.





## ***Complete list of the EURO-ENDO Investigators Group and EURO-ENDO National Coordinators***

**EORP Oversight Committee:** C.P. Gale, GB (Chair); B. Beleslin, RS; A. Budaj, PL; O. Chioncel, RO; N. Dagres, DE; N. Danchin, FR; J. Emberson, GB; D. Erlinge, SE; M. Glikson, IL; A. Gray, GB; M. Kayikcioglu, TR; A.P. Maggioni, IT; V.K. Nagy, HU; A. Nedoshivin, RU; A-S. Petronio, IT; J. Roos-Hesselink, NL; L. Wallentin, SE; U. Zeymer, DE.

**Executive Committee:** G. Habib, FR (Chair); P. Lancellotti, BE (Chair); B. Cosyns, BE; E. Donal, FR; P. Erba, IT; B. Iung, FR; A.P. Maggioni, IT; B.A. Popescu, RO; B. Prendergast, GB; P. Tornos, ES.

**EORP Team:** M. Andarala, C. Berle, A. Brunel-Lebecq, E. Fiorucci, C. Laroche, V. Missiamenou, C. Taylor.

**National Coordinators:** N.N. Ali Tatar-Chentir, DZ; M. Al-Mallah, SA; M. Astrom Aneq, SE; G. Athanassopoulos, GR; L.P. Badano, IT; S. Benyoussef, TN; E. Calderon Aranda, MX; N.M. Cardim, PT; K-L. Chan, CA; B. Cosyns, BE; I. Cruz, PT; T. Edvardsen, NO; G. Goliasch, AT; G. Habib, FR; A. Hagendorff, DE; K. Hristova, BG; B. Iung, FR; O. Kamp, NL; D-H. Kang, KR; W. Kong, SG; S. Matskeplishvili, RU; M. Meshaal, EG; M. Mirocevic, ME; A.N. Neskovic, RS; M. Pazdernik, CZ; E. Plonska-Gosciniak, PL; B.A. Popescu, RO; B. Prendergast, GB; M. Raissouni, MA; R. Ronderos, AR; L.E. Sade, TR; A. Sadeghpour, IR; A. Sambola, ES; S. Sengupta, IN; J. Separovic-Hanzevacki, HR; M. Takeuchi, JP; E. Tucay, PH; A.C. Tude Rodrigues, BR; A. Varga, HU; J. Vaskelyte, LT; K. Yamagata, MT; K. Yiangou, CY; H. Zaky, AE.

### **Investigators:**

Argentina:Buenos Aires: I. Granada, M. Mahia, S. Ressi, F. Nacinovich, A. Iribarren, P. Fernandez Oses, G. Avegliano, E. Filipini, Corrientes: R. Obregon, M. Bangher, J. Dho, La Plata: L. Cartasegna, M.L. Plastino, V. Novas, C. Shigel, Florencio Varela: G. Reyes, M. De Santos, N. Gastaldello, M. Granillo Fernandez, M. Potito, G. Streitenberger, P. Velazco, J.H. Casabé, C. Cortes, E. Guevara, F. Salmo, M. Seijo, Austria:Vienna: F. Weidinger, M. Heger, R. Brooks, C. Stöllberger, C-Y. Ho, L. Perschy, L. Puskas, C. Binder, R. Rosenhek, M. Schneider, M-P. Winter, Belgium:Liege: E. Hoffer, M. Melissopoulou, E. Lecoq, D. Legrand, S. Jacquet, M. Massoz, L. Pierard, S. Marchetta, R. Dulgheru, C. D´Emal, C. Oury, Jette: S. Droogmans, D. Kerkhove, D. Plein, L. Soens, C. Weytjens, A. Motoc, B. Roosens, I. Lemoine, Edegem: I. Rodrigus, B. Paelinck, B. Amsel, Brussels: P. Unger, D.

Konopnicki, C. Beauloye, A. Pasquet, J.L. Vanoverschelde, S. Pierard, D. Vancraeynest, F. Sinnaeve, Brazil: Sao Paulo: J.L. Andrade, K. Staszko, Porto Alegre: R. Dos Santos Monteiro, M.H. Miglioranza, D.L. Shuha, Rio de Janeiro: M. Alcantara, V. Cravo, L. Fazzio, A. Felix, M. Iso, C. Musa, A.P. Siciliano, Marilia: F. Villaca Filho, A. Rodrigues, F. Vilela, J. Braga, R. Silva, D. Rodrigues, L. Silva, S. Morhy, C. Fischer, R. Silva, M. Vieira, T. Afonso, Fortaleza: J. Abreu, S.N. Falcao, V.A. Moises, A. Gouvea, F.J. Mancuso, A.C. Souza, C.Y. Silva, G. João, C.S. Abboud, R. Bellio de Mattos Barretto, A. Ramos, R. Arnoni, J.E. Assef, D.J. Della Togna, D. Le Bihan, L. Miglioli, A.P. Romero Oliveira, R. Tadeu Magro Kroll, D. Cortez, Belo Horizonte: C.L. Gelape, M.d.C. Peirira Nunes, T.C. De Abreu Ferrari, Canada: Ottawa: K. Hay, Montreal: V. Le, M. Page, F. Poulin, C. Sauve, K. Serri, C. Mercure, Quebec: J. Beaudoin, P. Pibarot, I.A. Sebag, L.G. Rudski, G. Ricafort, Croatia: Zagreb: B. Barsic, V. Krajcinovic, M. Vargovic, D. Lovric, V. Reskovic-Luksic, J. Vincelj, S. Jaksic Jurinjak, Cyprus: Nicosia: V. Yiannikourides, M. Ioannides, C. Pofaides, V. Masoura, Czech Republic: Ostrava-Poruba: J. Pudich, Prague: A. Linhart, M. Siranec, J. Marek, K. Blechova, M. Kamenik, Hradec Kralove: R. Pelouch, Zlin: Z. Coufal, M. Mikulica, M. Griva, E. Jancova, M. Mikulcova, Olomouc: M. Taborsky, J. Precek, M. Jecmenova, J. Latal, Liberec: J. Widimsky, T. Butta, S. Machacek, Pilsen: R. Vancata, Brno: J. Spinar, M. Holicka, Ecuador: Guayaquil: F. Pow Chon Long, N. Anzules, A. Bajana Carpio, G. Largacha, E. Penaherrera, D. Moreira, Egypt: Mansoura: E. Mahfouz, E. Elsafty, A. Soliman, Y. Zayed, J. Aboulenein, Alexandria: M. Abdel-Hay, A. Almaghraby, M. Abdelnaby, M. Ahmed, B. Hammad, Y. Saleh, H. Zahran, O. Elgebaly, Zagazig: A. Saad, M. Ali, A. Zeid, R. El Sharkawy, Cairo: A. Al Kholy, R. Doss, D. Osama, H. Rizk, A. Elmogy, M. Mishriky, France: Kremlin-Bicêtre: P. Assayag, S. El Hatimi, Marseille: S. Hubert, J-P. Casalta, F. Gouriet, F. Arregle, S. Cammilleri, L. Tessonier, A. Riberi, Saint-Etienne: E. Botelho-Nevers, A. Gagneux-Brunon, R. Pierrard, C. Tulane, S. Campisi, J-F. Fuzellier, M. Detoc, T. Mehalla, Nantes: D. Boutoille, A.S. Lecompte, M. Lefebvre, S. Pattier, O. Al Habash, N. Asseray-Madani, C. Biron, J. Brochard, J. Caillon, C. Cueff, T. Le Tourneau, R. Lecomte, M.M. Magali Michel, J. Orain, S. Delarue, M. Le Bras, Limoges: J-F. Faucher, V. Aboyans, A. Beeharry, H. Durox, M. Lacoste, J. Magne, D. Mohty, A. David, V. Pradel, Thonon-les-Bains: V. Sierra, A. Neykova, B. Bettayeb, S. Elkentaoui, B. Tzvetkov, G. Landry, Reims: C. Strady, K. Ainine, S. Baumard, C. Brasselet, C. Tassigny, V. Valente-Pires, M. Lefranc, Pointe-à-Pitre: B. Hoen, B. Lefevre, E. Curlier, C. Callier, N. Fourcade, Brest: Y. Jobic, S. Ansard, R. Le Berre, F. Le Ven, M-C. Pouliquen, G. Prat, P. Le Roux, Rouen: F. Bouchart, A. Savoure, C. Alarcon, C. Chapuzet, I. Gueit, Amiens: C. Tribouilloy, Y. Bohbot, F. Peugeot, M. Gun, Paris: X. Duval, X. Lescure, E. Ilic-Habensus, Nancy: N. Sadoul, C. Selton-Suty, F. Alla, F. Goehringer, O. Huttin, E. Chevalier, Poitiers: R. Garcia, V. Le Marcis, Rennes: P. Tattevin, E. Flecher, M. Revest, Besançon: C. Chirouze, K. Bouiller, L. Hustache-Mathieu, T. Klopfenstein, J. Moreau, D. Fournier, A-S. Brunel, Créteil: P. Lim, L. Oliver, J. Ternacle, A. Moussafeur, Dijon: P. Chavanet, L. Piroth, A. Salmon-Rousseau, M. Buisson, S. Mahy, C. Martins, S. Gohier, Noumea: O. Axler, F. Baumann, S. Lebras, Germany: Bad Oeynhausen: C. Piper, D. Guckel, J. Börgermann, D. Horstkotte, E. Winkelmann, B. Brockmeier, Leipzig: D. Grey, Bonn: G. Nickenig, R. Schueler, C. Öztürk, E. Stöhr, Bad

Nauheim: C. Hamm, T. Walther, R. Brandt, A-C. Frühauf, C.T. Hartung, C. Hellner, C. Wild, Aachen: M. Becker, S. Hamada, W. Kaestner, Berlin: K. Stangl, F. Knebel, G. Baldenhofer, A. Brecht, H. Dreger, C. Isner, F. Pfafflin, M. Stegemann, Ludwigshafen: R. Zahn, B. Fraiture, C. Kilkowski, A-K. Karcher, S. Klinger, H. Tolksdorf, Greece:Athens: D. Tousoulis, C. Aggeli, S. Sideris, E. Venieri, G. Sarri, D. Tsiapras, I. Armenis, A. Koutsiori, G. Floros, C. Grassos, S. Dragasis, L. Rallidis, C. Varlamos, Ioannina: L. Michalis, K. Naka, A. Bechlioulis, A. Kotsia, L. Lakkas, K. Pappas, C. Papadopoulos, S. Kiokas, A. Lioni, S. Misailidou, J. Barbetseas, M. Bonou, C. Kapelios, I. Tomprou, K. Zerva, Voula: A. Manolis, E. Hamodraka, D. Athanasiou, G. Haralambidis, H. Samaras, L. Poulimenos, Hungary:Budapest: A. Nagy, A. Bartykowszki, E. Gara, India:Nagpur: K. Mungulmare, Gurgaon: R. Kasliwal, M. Bansal, S. Ranjan, A. Bhan, Iran:Tehran: M. Kyavar, M. Maleki, F. Noohi Bezanjani, A. Alizadehasl, S. Boudagh, A. Ghavidel, P. Moradnejad, H.R. Pasha, B. Ghadrdoost, Israel:Jerusalem: D. Gilon, J. Strahilevitz, M. Wanounou, S. Israel, Italy:Bari: C. d'Agostino, P. Colonna, L. De Michele, F. Fumarola, M. Stante, Florence: N. Marchionni, V. Scheggi, B. Alterini, S. Del Pace, P. Stefano, C. Sparano, Padova: N. Ruozzi, R. Tenaglia, D. Muraru, Grosseto: U. Limbruno, A. Cresti, P. Baratta, M. Solari, Milan: C. Giannattasio, A. Moreo, B. De Chiara, B. Lopez Montero, F. Musca, C.A. Orcese, F. Panzeri, F. Spano, C.F. Russo, O. Alfieri, M. De Bonis, S. Chiappetta, B. Del Forno, M. Ripa, P. Scarpellini, C. Tassan Din, B. Castiglioni, R. Pasciuta, S. Carletti, D. Ferrara, M. Guffanti, G. Iaci, E. Lapenna, T. Nisi, C. Oltolini, E. Busnardo, U. Pajoro, E. Agricola, R. Meneghin, D. Schiavi, Salerno: F. Piscione, R. Citro, R.M. Benvenega, L. Greco, L. Soriente, I. Radano, C. Prota, M. Bellino, D. Di Vece, Genoa: F. Santini, A. Salsano, G.M. Olivieri, Modena: F. Turrini, R. Messoria, S. Tondi, A. Olaru, V. Agnoletto, L. Grassi, C. Leonardi, S. Sansoni, Turin: S. Del Ponte, G.M. Actis Dato, A. De Martino, Japan:Nagoya: N. Ohte, S. Kikuchi, K. Wakami, Tsukuba: K. Aonuma, Y. Seo, T. Ishizu, T. Machino-Ohtsuka, M. Yamamoto, N. Iida, H. Nakajima, Tenri: Y. Nakagawa, C. Izumi, M. Amano, M. Miyake, K. Takahashi, Osaka: I. Shiojima, Y. Miyasaka, H. Maeba, Y. Suwa, N. Taniguchi, S. Tsujimoto, Kobe: T. Kitai, M. Ota, Sapporo: S. Yuda, S. Sasaki, Tokyo: N. Hagiwara, K. Yamazaki, K. Ashihara, K. Arai, C. Saitou, S. Saitou, G. Suzuki, Miyazaki: Y. Shibata, N. Watanabe, S. Nishino, K. Ashikaga, N. Kuriyama, K. Mahara, T. Okubo, H. Fujimaki, H. Shitan, H. Yamamoto, K. Abe, M. Terada, S. Takanashi, Tokushima: M. Sata, H. Yamada, K. Kusunose, Y. Saijo, H. Seno, O. Yuichiro, Suita: T. Onishi, F. Sera, S. Nakatani, H. Mizuno, K. Sengoku, Korea, Republic Of:Seoul: S.W. Park, K. Eun Kyoung, L. Ga Yeon, J-w. Hwang, C. Jin-Oh, S-J. Park, L. Sang-Chol, C. Sung-A, S.Y. Jang, R. Heo, S. Lee, J-M. Song, E. Jung, Lithuania:Siauliai: J. Plisiene, A. Dambrauskaite, G. Gruodyte, Kaunas:R. Jonkaitiene, V. Mizariene, J. Atkocaityte, R. Zvirblyte, Luxembourg:Luxembourg: R. Sow, A. Codreanu, T. Staub, C. Michaux, E.C.L. De la Vega, L. Jacobs-Orazi, Malta:Msida: C. Mallia Azzopardi, R.G. Xuereb, T. Piscopo, J. Farrugia, M. Fenech, E. Pillaha, C. Vella, D. Borg, R. Casha, Moldova, Republic Of:Chisinau: L. Grib, E. Raevschi, A. Grejdieru, D. Kravcenco, E. Prisacari, E. Samohvalov, S. Samohvalov, N. Scegllova, E. Panfile, L. Cardaniuc, V. Corcea, A. Feodorovici, V. Gaina, L. Girbu, P. Jimbei, G. Balan, I. Cardaniuc, I. Benesco, V. Marian, N. Sumarga, Montenegro:Podgorica: B. Bozovic, N. Bulatovic, P. Lakovic, L.

Music, Netherlands:Rotterdam: R. Budde, A. Wahadat, T. Gamela, Amsterdam: T. Meijers, Groningen: J.P. Van Melle, V.M. Deursen, Maastricht: H.J. Crijns, S.C. Bekkers, E.C. Cheriex, M. Gilbers, B.L. Kietselaer, C. Knackstedt, R. Lorusso, S. Schalla, S.A. Streukens, Utrecht: S. Chamuleau, M-J. Cramer, A. Teske, T. Van der Spoel, A. Wind, J. Lokhorst, O. Liesbek, H. Van Heusden, The Hague: W. Tanis, I. Van der Bilt, J. Vriend, H. De Lange-van Bruggen, E. Karijodikoro, R. Riezebos, E. van Dongen, J. Schoep, V. Stolk, Norway:Oslo: J.T. Offstad, J.O. Beitnes, T. Helle-Valle, H. Skulstad, R. Skardal, Pakistan:Karachi: N. Qamar, S. Furnaz, B. Ahmed, M.H. Butt, M.F. Khanzada, T. Saghir, A. Wahid, Poland:Warsaw: T. Hryniewiecki, P. Szymanski, K. Marzec, M. Misztal-Ogonowska, Wroclaw: W. Kosmala, M. Przewlocka-Kosmala, A. Rojek, K. Woznicka, J. Zachwyc, Bialystok: A. Lisowska, M. Kaminska, Lodz: J.D. Kasprzak, E. Kowalczyk, D.F. Strzecka, P. Wejner-Mik, Portugal:Carnaxide: M. Trabulo, P. Freitas, S. Ranchordas, G. Rodrigues, Guilhufe: P. Pinto, C. Queiros, J. Azevedo, L. Marques, D. Seabra, Lisbon: L. Branco, J. Abreu, M. Cruz, A. Galrinho, R. Moreira, P. Rio, A.T. Timoteo, M. Selas, V. Carmelo, B. Duque Neves, Almada: H. Pereira, A. Guerra, A. Marques, I. Pintassilgo, Romania:Timisoara: M.C. Tomescu, N-M. Trofenciuc, M. Andor, A. Bordejevic, H.S. Branea, F. Caruntu, L.A. Velcean, A. Mavrea, M.F. Onel, T. Parvanescu, D. Pop, A.L. Pop-Moldovan, M.I. Puticiu, L. Cirin, I.M. Citu, C.A. Cotoraci, D. Darabantiu, R. Farcas, I. Marincu, A. Ionac, D. Cozma, C. Mornos, F. Goanta, I. Popescu, Cluj-Napoca: R. Beyer, R. Mada, R. Rancea, R. Tomoaia, H. Rosianu, C. Stanescu, Russian Federation:Moscow: Z. Kobalava, J. Karaulova, E. Kotova, A. Milto, A. Pisaryuk, N. Povalyaev, M. Sorokina, Saudi Arabia:Jeddah: J. Alrahimi, A. Elshiekh, Riyadh: A. Jamiel, A. Ahmed, N. Attia, Serbia:Belgrade: B. Putnikovic, A. Dimic, B. Ivanovic, S. Matic, D. Trifunovic, J. Petrovic, D. Kosevic, I. Stojanovic, I. Petrovic, P. Dabic, P. Milojevic, Sremska Kamenica: I. Srdanovic, S. Susak, L. Velicki, A. Vulin, M. Kovacevic, A. Redzek, M. Stefanovic, Singapore:Singapore: T.C. Yeo, W. KF Kong, K.K. Poh, Spain:Madrid: I. Vilacosta, C. Ferrera, C. Olmos, M. Abd El- Nasser , Vigo - Pontevedra: F. Calvo Iglesias, E. Blanco-Gonzalez, M. Bravo Amaro, E. Lopez-Rodriguez, J. Lugo Adan, A.N. Germinas, P. Pazos-Lopez, M. Pereira Loureiro, M.T. Perez, S. Raposeiras-Roubin, S. Rasheed Yas, M-M. Suarez-Varela, F. Vasallo Vidal, Barcelona: D. Garcia-Dorado, N. Fernandez-Hidalgo, T. Gonzalez-Alujas, J. Lozano, O. Maisterra, N. Pizzi, R. Rios, Badalona: A. Bayes-Genis, L. Pedro Botet, N. Vallejo, C. Llibre, L. Mateu, R. Nunez, D. Quesada, E. Berastegui, Girona: D. Bosch Portell, J. Aboal Vinas, X. Albert Bertran, R. Brugada Tarradellas, P. Loma-Orsorio Ricon, C. Tiron de Llano, Valencia: M.A. Arnau, A. Bel, M. Blanes, A. Osa, Cordoba: M. Anguita, F. Carrasco, J.C. Castillo, J.L. Zamorano, J.L. Moya Mur, M. Alvaro, C. Fernandez-Golfin, J.M. Monteagudo, E. Navas Elorza, Santander: M.C. Farinas Alvarez, J. Aguerro Balbin, J. Zarauza, J.F. Gutierrez-Diez, C. Arminanzas , F. Arnaiz de las Revillas, A. Arnaiz Garcia, M. Cobo Belaustegui, M. Fernandez Sampedro, M. Gutierrez Cuadra, L. Garcia Cuello, C. Gonzalez Rico, Barakaldo: R. Rodriguez-Alvarez, J. Goikoetxea , M. Montejo , J.M. Miro, M. Almela, J. Ambrosioni, A. Moreno, E. Quintana, E. Sandoval, A. Tellez, J.M. Tolosana, B. Vidal, C. Falces, D. Fuster, C. Garcia-de-la-Maria, M. Hernandez-Meneses, J. Llopis, F. Marco, I. Ruiz-Zamora, Tarragona: A. Bardaji Ruiz, E. Sanz Girgas, G. Garcia-Pardo, M. Guillen Marzo, A. Rodriguez Oviedo, A. Villares

Jimenez, Tunisia:Sfax: L. Abid, R. Hammami, S. Kammoun, Tunis: M.S. Mourali, F. Mghaieth Zghal, M. Ben Hlima, S. Boudiche, S. Ouali, La Marsa: L. Zakhama, S. Antit, I. Slama, Turkey:Samsun: O. Gulel, M. Sahin, Ankara: L.E. Sade, E. Karacaglar, Istanbul: S. Kucukoglu, O. Cetinarslan, U.Y. Sinan, U. Canpolat, B. Mutlu, H. Atas, R. Dervishova, C. Ileri, United Arab Emirates:Dubai: J. Alhashmi, J. Tahir, P. Zarger, F. Baslib, United Kingdom:London: S. Woldman, L. Menezes, C. Primus, R. Uppal, I. Bvekerwa, Swindon: B. Chandrasekaran, A. Kopanska, J. Chambers, J. Hancock, J. Klein, R. Rajani, M.P. Ursi, S. Cannata, R. Dworakowski, A. Fife, J. Breeze, M. Browne-Morgan, M. Gunning, S. Streather, United States:Washington: F.M. Asch, M. Zemedkun, Uzbekistan:Tashkent: B. Alyavi, J. Uzokov.
